# Supplementary material
Source: Springer Nature journal article supplement (https://www.springermedizin.de/resource/supplementary/12865_2012_478_MOESM1_ESM.pdf/9428088)

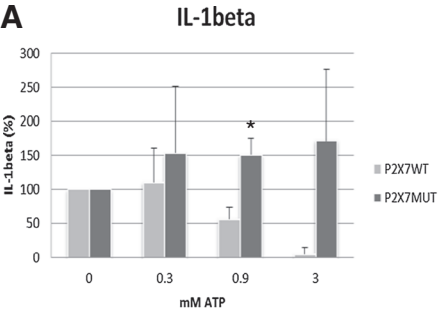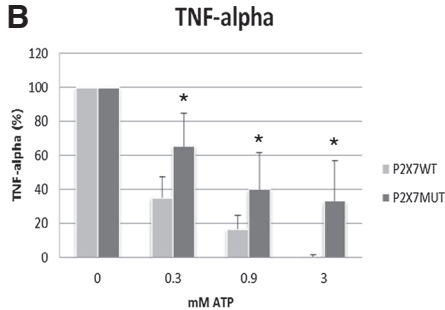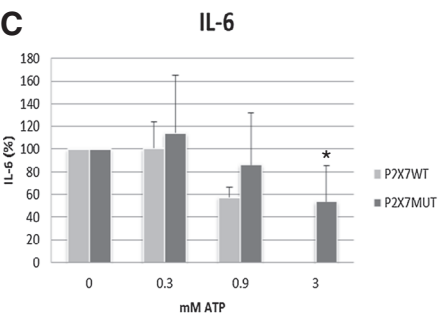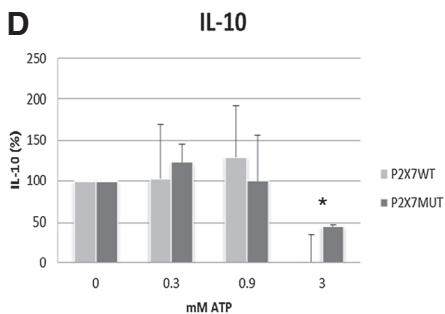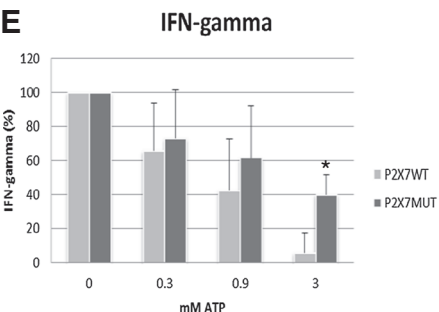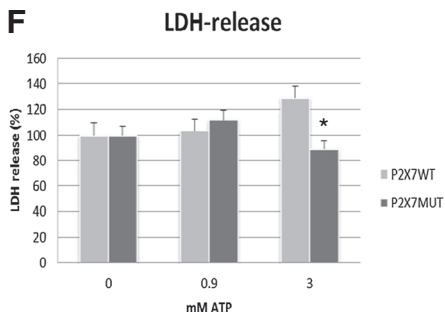

Supplement: MOESM1 [file 9428088]
